# Supplementary material for: Elucidation of the adaptability of Cinnamomum camphora seedlings from different provenances via analyzing photosynthetic characteristics and anatomical structure
Source: PeerJ. 2025 Sep 5;13:e19934. doi: 10.7717/peerj.19934 (PMC12422265; doi:10.7717/peerj.19934)
Supplement: Supplemental Information 1 — Photosynthetic gas exchange parameters (Pn, Gs, Ci, Tr, Ls, WUE) and its related environmental parameters (Ta, RH, VPD). This data includes raw data, mean, standard error, and significance analysis. [file peerj-13-19934-s001.xlsx]

## Sheet: Ta
Ta/℃
Time																						Mean	SE
09:00:00	18.4718	18.4775	18.478	18.7098	18.6797	18.6733	18.4153	18.3535	18.3472	18.4076	18.4589	18.4614	18.2267	17.824	17.8246	18.356	18.3572	18.3601	18.7109	18.7151		18.4154	0.0554
10:00:00	20.2861	20.4427	20.4434	20.366	20.5735	20.5667	20.6484	20.7849	20.7875	20.7332	20.7719	20.7716	20.6981	20.298	20.2968	19.7315	19.7322	19.7302	20.0273	20.0242		20.3857	0.0819
11:00:00	22.8618	22.8591	22.6938	23.0339	23.0321	22.9576	22.7695	22.7673	22.5195	22.5179	22.8518	22.8364	22.8356	22.7869	22.7758	22.776	22.7962	22.7641	22.7608	23.0231		22.811	0.0312
12:00:00	23.2443	23.0045	23.0011	23.202	23.205	23.2113	23.321	23.2688	23.2681	23.2329	23.0426	23.042	22.9711	22.9291	22.8842	22.918	22.8925	23.4099	23.4346	23.2658		23.1374	0.0391
13:00:00	23.0962	23.1063	23.0159	22.9742	22.8394	22.8379	23.2237	23.2541	23.2551	23.2621	23.2778	23.2773	23.4448	23.4518	23.4633	23.5618	23.3043	23.3028	23.2614	23.3937		23.2302	0.0446
14:00:00	23.2573	23.3446	23.1848	23.2059	23.1489	23.3005	23.4731	23.466	23.4687	23.3888	23.4966	23.4993	23.5374	23.4477	23.446	23.5426	23.5449	23.5436	23.5305	23.3804		23.4104	0.0288
15:00:00	21.2722	20.269	20.2676	20.134	20.14	20.1419	20.1044	20.1062	20.1077	20.1705	20.3912	20.3942	20.4093	20.4166	20.4198	20.4087	20.4096	20.4091	20.3663	21.128		20.3733	0.0694
16:00:00	17.8882	17.8856	17.8838	17.8849	17.8976	17.8954	18.1551	18.1575	18.2131	18.2125	18.2094	18.2623	18.2357	18.2343	18.2333	18.1667	18.1663	18.2559	17.8463	17.8455		18.0765	0.0378
17:00:00	16.7129	16.82	16.8235	16.8253	16.8247	16.8257	16.8305	16.8317	16.8315	16.8332	16.8327	16.8278	16.8057	16.7794	16.779	16.6431	16.6549	16.6581	16.5903	16.5971		16.7664	0.0196

## Sheet: RH
RH
Time																						Mean	SE
09:00:00	32.4201	31.5468	31.5543	32.0847	32.8463	32.848	33.6832	33.2482	33.2491	31.2912	30.76	30.7667	31.008	29.2936	29.2918	34.5455	34.5545	34.5529	34.7972	34.8144		32.4578	0.3915
10:00:00	30.4828	31.157	31.1614	30.4122	30.7679	30.8012	28.6255	27.3707	27.3785	27.2912	27.9071	27.9117	29.9499	30.9351	30.9411	29.6381	29.6418	29.6367	28.1717	28.1787		29.418	0.3167
11:00:00	27.2989	27.3039	29.0632	29.5521	29.5487	28.7064	28.6168	28.6191	28.4537	28.4646	27.5918	27.1442	27.1447	26.4159	27.4583	27.4609	28.1942	27.9257	27.9246	27.7029		28.0295	0.1881
12:00:00	28.0712	28.9834	28.9977	28.8033	28.6583	28.7096	28.9118	28.8083	28.3656	28.2361	28.2353	28.2413	27.0373	27.9701	27.9778	29.3375	29.2646	29.2687	28.1925	27.9678		28.5019	0.1284
13:00:00	29.5311	29.1347	30.3903	29.0854	30.1371	30.139	30.7534	30.8557	30.867	30.5138	29.5361	29.5327	28.2584	28.9474	28.933	28.8383	28.5857	28.595	29.4803	28.7555		29.5435	0.185
14:00:00	28.9856	29.9645	29.9818	28.7905	28.6557	29.9606	30.3247	29.7733	28.9608	28.2495	28.5384	28.543	28.6383	28.7942	28.8012	28.9166	28.9856	28.9931	29.2959	28.5182		29.0836	0.133
15:00:00	30.7906	32.5183	32.5098	32.8732	32.8897	32.8966	32.8325	32.8658	32.881	31.9041	31.4154	31.4177	32.3037	32.3456	32.3658	31.6955	31.6881	31.6983	31.9284	30.6051		32.1213	0.1585
16:00:00	34.5201	34.508	34.5196	34.4974	34.0138	34.0438	34.1228	34.1376	33.9077	33.901	33.906	33.6772	33.6915	33.6997	33.6875	33.7046	33.6886	34.7719	34.5434	34.5641		34.1053	0.0838
17:00:00	35.4569	35.4056	35.3644	35.282	35.2051	35.1373	34.706	34.6958	34.6947	34.6858	34.6802	34.6676	34.6429	34.597	34.5987	35.1247	35.0938	35.0774	35.2433	35.218		34.9789	0.069

## Sheet: VPD
VPD
FZ							Mean	SE
09:00:00	1.47632	1.47573	1.46336	1.45127	1.451		1.4635	0.0056
10:00:00	1.64502	1.6403	1.64045	1.65024	1.64714		1.6446	0.0019
11:00:00	1.97925	1.95601	1.97825	1.97994	1.98016		1.9747	0.0047
12:00:00	1.98779	1.96833	1.96811	2.00532	2.00611		1.9871	0.0084
13:00:00	1.92217	1.9068	1.9071	1.93755	1.93771		1.9223	0.0069
14:00:00	2.023	2.02255	2.03259	2.04318	2.04307		2.0329	0.0046
15:00:00	1.752	1.74618	1.74576	1.72551	1.73167		1.7402	0.005
16:00:00	1.38639	1.39972	1.39934	1.39915	1.38651		1.3942	0.0032
17:00:00	1.24107	1.23671	1.23814	1.24084	1.24361		1.2401	0.0012
SH
09:00:00	1.47711	1.5124	1.51288	1.44235	1.44233		1.4774	0.0157
10:00:00	1.7725	1.77728	1.77764	1.76798	1.76807		1.7727	0.0021
11:00:00	2.12034	2.11956	2.14742	2.17629	2.17605		2.1479	0.0126
12:00:00	2.18778	2.17879	2.18929	2.16875	2.16845		2.1786	0.0045
13:00:00	2.09469	2.09656	2.10069	2.09716	2.09646		2.0971	0.001
14:00:00	2.06288	2.06524	2.06136	2.0676	2.06745		2.0649	0.0012
15:00:00	1.76648	1.78229	1.78217	1.75156	1.75077		1.7667	0.0069
16:00:00	1.37134	1.35937	1.37172	1.34784	1.34736		1.3595	0.0054
17:00:00	1.26934	1.26968	1.26968	1.26976	1.26955		1.2696	0.0001
SZ
09:00:00	1.40484	1.42386	1.42413	1.43823	1.41908		1.422	0.0054
10:00:00	1.63872	1.67075	1.67027	1.65795	1.62596		1.6527	0.0089
11:00:00	2.01025	2.00809	2.00971	2.00665	2.00586		2.0081	0.0008
12:00:00	2.08156	2.08786	2.08754	2.07663	2.07573		2.0819	0.0026
13:00:00	2.06185	2.05673	2.06104	2.05247	2.05222		2.0569	0.002
14:00:00	2.07289	2.07348	2.07409	2.07179	2.07164		2.0728	0.0005
15:00:00	1.47227	1.47212	1.47191	1.47168	1.47219		1.472	0.0001
16:00:00	1.37933	1.37895	1.368	1.36776	1.38956		1.3767	0.0041
17:00:00	1.22476	1.22847	1.2303	1.23199	1.23271		1.2296	0.0014
WH
09:00:00	1.41718	1.43493	1.43466	1.43515	1.4165		1.4277	0.0044
10:00:00	1.74848	1.74826	1.75045	1.75255	1.75272		1.7505	0.001
11:00:00	1.91805	1.92991	1.93023	1.9072	1.90647		1.9184	0.0052
12:00:00	1.96103	1.95525	1.95953	1.95092	1.95088		1.9555	0.0021
13:00:00	2.01105	2.05467	2.05619	2.02594	1.98262		2.0261	0.0139
14:00:00	2.07289	2.01479	2.01446	2.01358	2.07113		2.0374	0.0141
15:00:00	1.54754	1.54801	1.54802	1.54858	1.54879		1.5482	0.0002
16:00:00	1.41109	1.41093	1.41017	1.41111	1.41169		1.411	0.0002
17:00:00	1.25939	1.25981	1.25986	1.25603	1.25714		1.2584	0.0008
	Average
FZ	1.71107
SH	1.79271
SZ	1.70808
WH	1.70369

## Sheet: Pn and Adaily
Diurnal variations of Pn
Time	Provenances							Provenances	Mean	SE
09:00:00	Fuzhou	6.71712	6.72457	6.67126	6.69094	6.72719		Fuzhou	6.7062	0.0108
09:00:00	Shanghai	1.28702	1.29216	1.97318	2.65933	2.60641		Shanghai	1.9636	0.3005
09:00:00	Shenzhen	6.56678	6.10289	6.08205	7.05627	7.05796		Shenzhen	6.5732	0.2157
09:00:00	Wuhan	8.19737	8.19613	7.58819	7.61071	7.87018		Wuhan	7.8925	0.1337
10:00:00	Fuzhou	8.14548	9.23646	9.24115	7.04173	7.19379		Fuzhou	8.1717	0.4749
10:00:00	Shanghai	2.7604	2.56017	2.57534	2.94243	2.94295		Shanghai	2.7563	0.0839
10:00:00	Shenzhen	8.00547	7.48816	8.01516	6.91383	6.95426		Shenzhen	7.4754	0.2408
10:00:00	Wuhan	9.07062	9.06911	9.27656	9.45803	9.45445		Wuhan	9.2658	0.0864
11:00:00	Fuzhou	10.2269	10.212	9.8112	9.4951	9.59052		Fuzhou	9.8671	0.1527
11:00:00	Shanghai	4.39258	4.42835	4.38804	4.40839	4.36884		Shanghai	4.3972	0.01
11:00:00	Shenzhen	8.74763	9.09107	9.06315	8.39652	8.38684		Shenzhen	8.737	0.1534
11:00:00	Wuhan	9.32311	9.30332	9.07875	8.87013	8.85933		Wuhan	9.0869	0.1004
12:00:00	Fuzhou	8.14976	8.14534	8.39445	8.59957	8.60369		Fuzhou	8.3786	0.1016
12:00:00	Shanghai	5.65016	5.64866	5.66762	5.67257	5.64175		Shanghai	5.6562	0.0059
12:00:00	Shenzhen	8.29821	8.26526	8.25877	8.2906	8.30057		Shenzhen	8.2827	0.0087
12:00:00	Wuhan	7.23977	7.24728	7.005	6.80449	6.77488		Wuhan	7.0143	0.1016
13:00:00	Fuzhou	9.17139	9.20466	9.18506	9.12603	9.13631		Fuzhou	9.1647	0.0148
13:00:00	Shanghai	6.5818	6.3319	6.57447	6.08287	6.14619		Shanghai	6.3434	0.1042
13:00:00	Shenzhen	9.26552	9.28139	9.25822	9.19728	9.22965		Shenzhen	9.2464	0.0149
13:00:00	Wuhan	8.97777	8.95368	9.43873	9.90334	9.86611		Wuhan	9.4279	0.2056
14:00:00	Fuzhou	7.15179	7.52464	6.77116	7.5291	6.82575		Fuzhou	7.1605	0.1631
14:00:00	Shanghai	5.3095	5.3293	5.37704	5.9826	5.92464		Shanghai	5.5846	0.1513
14:00:00	Shenzhen	9.22559	9.29718	9.32083	9.15972	9.17867		Shenzhen	9.2364	0.0317
14:00:00	Wuhan	8.72368	8.73116	9.04294	9.36811	9.37722		Wuhan	9.0486	0.1443
15:00:00	Fuzhou	6.48523	6.44686	6.43784	6.2238	6.15733		Fuzhou	6.3502	0.0665
15:00:00	Shanghai	6.08827	6.14385	6.13721	6.13604	6.14417		Shanghai	6.1299	0.0105
15:00:00	Shenzhen	6.41835	6.41071	6.41655	6.40804	6.41542		Shenzhen	6.4138	0.0019
15:00:00	Wuhan	5.8168	5.82087	5.7805	5.7894	5.80494		Wuhan	5.8025	0.0078
16:00:00	Fuzhou	1.98111	1.97477	1.99749	1.99747	1.98339		Fuzhou	1.9868	0.0046
16:00:00	Shanghai	2.51018	2.52889	2.23763	2.09118	2.02843		Shanghai	2.2793	0.1038
16:00:00	Shenzhen	1.53124	1.48819	1.68706	1.57882	1.31807		Shenzhen	1.5207	0.0605
16:00:00	Wuhan	2.88039	2.89526	2.95337	2.94091	2.83715		Wuhan	2.9014	0.0211
17:00:00	Fuzhou	1.19665	1.29898	1.20376	1.40976	1.4742		Fuzhou	1.3167	0.0552
17:00:00	Shanghai	2.10102	2.03488	2.11069	2.07241	2.17679		Shanghai	2.0992	0.0235
17:00:00	Shenzhen	1.42646	1.31147	1.19403	1.109	1.02753		Shenzhen	1.2137	0.071
17:00:00	Wuhan	1.15724	1.1657	1.14101	1.12736	1.14941		Wuhan	1.1481	0.0066
Daily average values of Pn
Provenances/Time	09:00:00	10:00:00	11:00:00	12:00:00	13:00:00	14:00:00	15:00:00	16:00:00	17:00:00	Average	SE	5% level
Fuzhou	6.7062	8.1717	9.8671	8.3786	9.1647	7.1605	6.3502	1.9868	1.3167	6.5669	1.0032	a
Shanghai	1.9636	2.7563	4.3972	5.6562	6.3434	5.5846	6.1299	2.2793	2.0992	4.1344	0.6185	a
Shenzhen	6.5732	7.4754	8.737	8.2827	9.2464	9.2364	6.4138	1.5207	1.2137	6.5221	1.0335	a
Wuhan	7.8925	9.2658	9.0869	7.0143	9.4279	9.0486	5.8025	2.9014	1.1481	6.8431	1.0044	a
Adaily	（μmol·m⁻²·d⁻¹）
Fuzhou	198967	204323	200793	194627	192929
Shanghai	125953	124685	125997	128455	128119
Shenzhen	199759	198105	200368	194499	193774
Wuhan	204154	204126	204986	207012	206942
Adaily	（mol·m⁻²·d⁻¹）						Average	SE	5% level
Fuzhou	0.198967	0.204323	0.200793	0.194627	0.192929		0.1983	0.0021	b
Shanghai	0.125953	0.124685	0.125997	0.128455	0.128119		0.1266	0.0007	c
Shenzhen	0.199759	0.198105	0.200368	0.194499	0.193774		0.1973	0.0013	b
Wuhan	0.204154	0.204126	0.204986	0.207012	0.206942		0.2054	0.0006	a

## Sheet: Gs
Diurnal variations of Gs
Time	Provenances							Provenances	Mean	SE
09:00:00	Fuzhou	0.0372625	0.036328	0.0362644	0.0356505	0.0357808		Fuzhou	0.0363	0.0003
09:00:00	Shanghai	0.00838172	0.00507996	0.00508037	0.0116865	0.011655		Shanghai	0.0084	0.0015
09:00:00	Shenzhen	0.0427523	0.0408057	0.0428397	0.0389181	0.0387768		Shenzhen	0.0408	0.0009
09:00:00	Wuhan	0.0544514	0.0535508	0.0535806	0.0548706	0.0552566		Wuhan	0.0543	0.0003
10:00:00	Fuzhou	0.050067	0.0557975	0.0558217	0.0445611	0.0461872		Fuzhou	0.0505	0.0023
10:00:00	Shanghai	0.0117376	0.0120948	0.011767	0.0123976	0.0124647		Shanghai	0.0121	0.0002
10:00:00	Shenzhen	0.0459842	0.0392251	0.045864	0.0322895	0.0324105		Shenzhen	0.0392	0.003
10:00:00	Wuhan	0.0506694	0.0507331	0.0505802	0.0503793	0.0504203		Wuhan	0.0506	0.0001
11:00:00	Fuzhou	0.0574684	0.0574711	0.0532353	0.0618175	0.0617878		Fuzhou	0.0584	0.0016
11:00:00	Shanghai	0.0217634	0.0218561	0.0249719	0.0194782	0.0195501		Shanghai	0.0215	0.001
11:00:00	Shenzhen	0.0495661	0.0493764	0.0494382	0.0497518	0.0497681		Shenzhen	0.0496	0.0001
11:00:00	Wuhan	0.0491237	0.0471776	0.0472413	0.0509304	0.0510667		Wuhan	0.0491	0.0008
12:00:00	Fuzhou	0.0409684	0.0414504	0.0410439	0.0417344	0.0418147		Fuzhou	0.0414	0.0002
12:00:00	Shanghai	0.0398857	0.0366505	0.0370104	0.0430434	0.0432068		Shanghai	0.04	0.0014
12:00:00	Shenzhen	0.0392035	0.0397528	0.0399271	0.0387207	0.038938		Shenzhen	0.0393	0.0002
12:00:00	Wuhan	0.0416701	0.0418257	0.0406436	0.0394179	0.0396641		Wuhan	0.0406	0.0005
13:00:00	Fuzhou	0.046819	0.0477788	0.0478467	0.0458049	0.0458362		Fuzhou	0.0468	0.0004
13:00:00	Shanghai	0.0331976	0.0374924	0.0375561	0.0289526	0.0289728		Shanghai	0.0332	0.0019
13:00:00	Shenzhen	0.0396417	0.0396937	0.0423485	0.0450315	0.0450817		Shenzhen	0.0424	0.0012
13:00:00	Wuhan	0.045871	0.0437554	0.0438344	0.0476814	0.0481362		Wuhan	0.0459	0.0009
14:00:00	Fuzhou	0.031326	0.0349701	0.0350998	0.0282504	0.0284228		Fuzhou	0.0316	0.0015
14:00:00	Shanghai	0.0278504	0.0274315	0.028178	0.0269592	0.0271437		Shanghai	0.0275	0.0002
14:00:00	Shenzhen	0.0375451	0.0361781	0.036228	0.038475	0.038689		Shenzhen	0.0374	0.0005
14:00:00	Wuhan	0.0380249	0.0375534	0.0376406	0.0383118	0.0385604		Wuhan	0.038	0.0002
15:00:00	Fuzhou	0.0319552	0.0309276	0.0301596	0.0317777	0.031866		Fuzhou	0.0313	0.0003
15:00:00	Shanghai	0.0262829	0.02673	0.0269406	0.0261013	0.0261406		Shanghai	0.0264	0.0002
15:00:00	Shenzhen	0.0258382	0.0258585	0.0260341	0.0257365	0.0256742		Shenzhen	0.0258	0.0001
15:00:00	Wuhan	0.0259884	0.0261011	0.0261585	0.0259561	0.0260551		Wuhan	0.0261	0
16:00:00	Fuzhou	0.0149446	0.0143728	0.014059	0.0140822	0.0149328		Fuzhou	0.0145	0.0002
16:00:00	Shanghai	0.0138339	0.0120418	0.0107081	0.0106802	0.0106658		Shanghai	0.0116	0.0006
16:00:00	Shenzhen	0.00667989	0.00698635	0.00661878	0.00679668	0.00640359		Shenzhen	0.0067	0.0001
16:00:00	Wuhan	0.0126476	0.0126844	0.0126844	0.0123092	0.0121606		Wuhan	0.0125	0.0001
17:00:00	Fuzhou	0.0422076	0.0450077	0.0441643	0.0423478	0.0406241		Fuzhou	0.0429	0.0008
17:00:00	Shanghai	0.0162155	0.016049	0.015657	0.0161617	0.0161984		Shanghai	0.0161	0.0001
17:00:00	Shenzhen	0.0196075	0.0193025	0.019048	0.0188103	0.0185196		Shenzhen	0.0191	0.0002
17:00:00	Wuhan	0.0126259	0.0130269	0.0132735	0.012814	0.0122855		Wuhan	0.0128	0.0002
Daily average values of Gs
Provenances/Time	09:00:00	10:00:00	11:00:00	12:00:00	13:00:00	14:00:00	15:00:00	16:00:00	17:00:00	Average	SE	5% level
Fuzhou	0.0363	0.0505	0.0584	0.0414	0.0468	0.0316	0.0313	0.0145	0.0429	0.0393	0.0043	a
Shanghai	0.0084	0.0121	0.0215	0.04	0.0332	0.0275	0.0264	0.0116	0.0161	0.0218667	0.0036	b
Shenzhen	0.0408	0.0392	0.0496	0.0393	0.0424	0.0374	0.0258	0.0067	0.0191	0.0333667	0.0045	ab
Wuhan	0.0543	0.0506	0.0491	0.0406	0.0459	0.038	0.0261	0.0125	0.0128	0.0366556	0.0053	a

## Sheet: Ci
Diurnal variations of Ci
Time	Provenances							Provenances	Mean	SE
09:00:00	Fuzhou	160.085	147.027	159.626	148.294	148.002		Fuzhou	152.607	2.9678
09:00:00	Shanghai	44.3171	45.4167	67.4566	81.9527	84.7083		Shanghai	64.7703	8.6397
09:00:00	Shenzhen	166.101	171.751	169.008	175.615	174.382		Shenzhen	171.371	1.7403
09:00:00	Wuhan	196.771	203.233	197.551	209.231	210.487		Wuhan	203.454	2.8496
10:00:00	Fuzhou	169.022	178.902	169.707	186.994	191.437		Fuzhou	152.607	2.9678
10:00:00	Shanghai	84.2769	100.084	99.2406	68.4209	70.324		Shanghai	64.7703	8.6397
10:00:00	Shenzhen	137.637	138.846	119.241	101.748	100.98		Shenzhen	171.371	1.7403
10:00:00	Wuhan	147.856	148.892	145.09	146.88	143.502		Wuhan	203.454	2.8496
11:00:00	Fuzhou	140.436	141.118	140.324	141.858	139.243		Fuzhou	140.596	0.4357
11:00:00	Shanghai	79.8039	82.0875	80.6015	88.6458	84.8404		Shanghai	83.1958	1.6104
11:00:00	Shenzhen	136.853	135.895	139.509	133.156	134.54		Shenzhen	135.991	1.0787
11:00:00	Wuhan	126.357	127.507	129.343	132.419	131.591		Wuhan	129.444	1.1565
12:00:00	Fuzhou	93.0436	97.7541	101.638	103.935	105.922		Fuzhou	100.458	2.298
12:00:00	Shanghai	192.683	188.44	191.733	187.898	189.846		Shanghai	190.12	0.9222
12:00:00	Shenzhen	93.8445	93.3336	92.6074	94.8316	93.0635		Shenzhen	93.5361	0.3808
12:00:00	Wuhan	136.236	144.849	137.129	149.831	152.583		Wuhan	144.126	3.2849
13:00:00	Fuzhou	119.976	113.329	120.738	108.567	107.811		Fuzhou	114.084	2.7327
13:00:00	Shanghai	133.607	131.808	116.259	100.094	96.7654		Shanghai	115.707	7.6894
13:00:00	Shenzhen	78.1249	79.7107	80.8671	80.1717	77.6105		Shenzhen	79.297	0.6172
13:00:00	Wuhan	104.409	105.316	83.9942	68.5121	66.2948		Wuhan	85.7052	8.3956
14:00:00	Fuzhou	64.3928	63.5937	64.805	64.3086	65.3131		Fuzhou	64.4826	0.2848
14:00:00	Shanghai	103.563	124.782	107.902	143.254	147.714		Shanghai	125.443	8.9444
14:00:00	Shenzhen	36.1018	33.9466	36.4709	36.7937	34.9034		Shenzhen	35.6433	0.5313
14:00:00	Wuhan	41.8404	46.558	46.0895	45.1472	46.0229		Wuhan	45.1316	0.8538
15:00:00	Fuzhou	108.453	105.464	110.364	99.8154	104.204		Fuzhou	105.66	1.8199
15:00:00	Shanghai	58.8608	59.7929	57.6551	58.2562	61.8155		Shanghai	59.2761	0.7265
15:00:00	Shenzhen	41.0708	43.6891	42.2006	43.3542	40.1745		Shenzhen	42.0978	0.6661
15:00:00	Wuhan	84.5398	82.7745	83.0255	84.5938	85.776		Wuhan	84.1419	0.5545
16:00:00	Fuzhou	231.561	232.041	226.605	232.814	228.068		Fuzhou	230.218	1.2153
16:00:00	Shanghai	129.536	141.723	123.507	136.435	150.042		Shanghai	136.249	4.6242
16:00:00	Shenzhen	89.5454	98.3473	69.907	88.2241	126.788		Shenzhen	94.5623	9.2898
16:00:00	Wuhan	94.7758	86.6726	86.4461	77.1305	86.2196		Wuhan	86.2489	2.7935
17:00:00	Fuzhou	427.348	419.79	426.119	416.192	410.655		Fuzhou	420.021	3.109
17:00:00	Shanghai	262.757	275.268	268.412	272.758	267.003		Shanghai	269.24	2.1959
17:00:00	Shenzhen	361.093	368.889	377.426	383.483	389.128		Shenzhen	376.004	5.0157
17:00:00	Wuhan	337.503	333.071	331.868	341.245	336.384		Wuhan	336.014	1.6669
Daily average values of Ci
Provenances/Time	09:00:00	10:00:00	11:00:00	12:00:00	13:00:00	14:00:00	15:00:00	16:00:00	17:00:00	Average	SE	5% level
Fuzhou	152.607	152.607	140.596	100.458	114.084	64.4826	105.66	230.218	420.021	164.526	35.4677	a
Shanghai	64.7703	64.7703	83.1958	190.12	115.707	125.443	59.2761	136.249	269.24	123.197	23.1396	a
Shenzhen	171.371	171.371	135.991	93.5361	79.297	35.6433	42.0978	94.5623	376.004	133.319	34.4931	a
Wuhan	203.454	203.454	129.444	144.126	85.7052	45.1316	84.1419	86.2489	336.014	146.413	29.8585	a

## Sheet: Tr
Diurnal variations of Tr
Time	Provenances							Provenances	Mean	SE
09:00:00	Fuzhou	0.525296	0.520708	0.519791	0.529048	0.530203		Fuzhou	0.525	0.0021
09:00:00	Shanghai	0.0769001	0.123091	0.077187	0.168823	0.168389		Shanghai	0.1229	0.0205
09:00:00	Shenzhen	0.589811	0.573856	0.5911	0.549938	0.55247		Shenzhen	0.5714	0.0088
09:00:00	Wuhan	0.765575	0.757845	0.759541	0.768472	0.773198		Wuhan	0.7649	0.0028
10:00:00	Fuzhou	0.904568	0.816711	0.906214	0.730381	0.755162		Fuzhou	0.8226	0.0366
10:00:00	Shanghai	0.215348	0.209264	0.210054	0.22004	0.221232		Shanghai	0.2152	0.0025
10:00:00	Shenzhen	0.753948	0.639822	0.756847	0.525205	0.525905		Shenzhen	0.6403	0.0514
10:00:00	Wuhan	0.87282	0.874292	0.875635	0.873923	0.876293		Wuhan	0.8746	0.0006
11:00:00	Fuzhou	1.11916	1.12019	1.05402	1.18398	1.18259		Fuzhou	1.132	0.0241
11:00:00	Shanghai	0.466138	0.444408	0.467852	0.420485	0.422251		Shanghai	0.4442	0.0102
11:00:00	Shenzhen	0.991102	0.978166	0.979206	1.0056	1.00676		Shenzhen	0.9922	0.0062
11:00:00	Wuhan	0.934498	0.90047	0.901673	0.966281	0.968509		Wuhan	0.9343	0.0148
12:00:00	Fuzhou	0.821926	0.806013	0.805917	0.836948	0.838452		Fuzhou	0.8219	0.0071
12:00:00	Shanghai	0.865953	0.785971	0.79345	0.950503	0.949816		Shanghai	0.8691	0.0359
12:00:00	Shenzhen	0.897481	0.900677	0.858914	0.813059	0.817068		Shenzhen	0.8574	0.0188
12:00:00	Wuhan	0.816359	0.819043	0.794083	0.768566	0.773041		Wuhan	0.7942	0.0105
13:00:00	Fuzhou	0.902394	0.902297	0.902637	0.902125	0.902637		Fuzhou	0.9024	0.0001
13:00:00	Shanghai	0.77716	0.698394	0.779855	0.618137	0.618596		Shanghai	0.6984	0.0358
13:00:00	Shenzhen	0.811329	0.812112	0.865525	0.919506	0.920022		Shenzhen	0.8657	0.0242
13:00:00	Wuhan	0.922442	0.8967	0.898964	0.943061	0.950433		Wuhan	0.9223	0.011
14:00:00	Fuzhou	0.629777	0.639635	0.630358	0.647891	0.648562		Fuzhou	0.6392	0.0041
14:00:00	Shanghai	0.575695	0.578012	0.572026	0.563515	0.567376		Shanghai	0.5713	0.0027
14:00:00	Shenzhen	0.784913	0.789507	0.756116	0.725579	0.728004		Shenzhen	0.7568	0.0135
14:00:00	Wuhan	0.77221	0.779964	0.781518	0.761958	0.768405		Wuhan	0.7728	0.0036
15:00:00	Fuzhou	0.546284	0.543953	0.546256	0.545793	0.549289		Fuzhou	0.5463	0.0009
15:00:00	Shanghai	0.463705	0.466981	0.474971	0.46205	0.46507		Shanghai	0.4666	0.0023
15:00:00	Shenzhen	0.380802	0.381598	0.383659	0.37847	0.381567		Shenzhen	0.3812	0.0008
15:00:00	Wuhan	0.402824	0.404579	0.404603	0.404508	0.404115		Wuhan	0.4041	0.0003
16:00:00	Fuzhou	0.202527	0.20185	0.202151	0.202734	0.201913		Fuzhou	0.2022	0.0002
16:00:00	Shanghai	0.156525	0.16841	0.167725	0.145599	0.144459		Shanghai	0.1565	0.0052
16:00:00	Shenzhen	0.0920254	0.0918236	0.0961826	0.0942584	0.0895711		Shenzhen	0.0928	0.0011
16:00:00	Wuhan	0.179257	0.176056	0.179658	0.174483	0.172455		Wuhan	0.1764	0.0014
17:00:00	Fuzhou	0.521234	0.553537	0.54394	0.52302	0.503136		Fuzhou	0.529	0.0089
17:00:00	Shanghai	0.209019	0.205342	0.203373	0.205877	0.206347		Shanghai	0.206	0.0009
17:00:00	Shenzhen	0.241044	0.237572	0.234662	0.231971	0.228541		Shenzhen	0.2348	0.0022
17:00:00	Wuhan	0.161335	0.16378	0.161263	0.16127	0.161532		Wuhan	0.1618	0.0005
Daily average values of Tr
Provenances/Time	09:00:00	10:00:00	11:00:00	12:00:00	13:00:00	14:00:00	15:00:00	16:00:00	17:00:00	Average	SE	5% level
Fuzhou	0.525	0.8226	1.132	0.8219	0.9024	0.6392	0.5463	0.2022	0.529	0.6801	0.0904	a
Shanghai	0.1229	0.2152	0.4442	0.8691	0.6984	0.5713	0.4666	0.1565	0.206	0.4167	0.0874	a
Shenzhen	0.5714	0.6403	0.9922	0.8574	0.8657	0.7568	0.3812	0.0928	0.2348	0.5992	0.1025	a
Wuhan	0.7649	0.8746	0.9343	0.7942	0.9223	0.7728	0.4041	0.1764	0.1618	0.645	0.1039	a

## Sheet: Ls
Diurnal variations of Ls
Time	Provenances							Provenances	Mean	SE
09:00:00	Fuzhou	0.655427	0.653598	0.668879	0.68239	0.688296		Fuzhou	0.6697	0.007
09:00:00	Shanghai	0.903137	0.900733	0.852325	0.820418	0.81438		Shanghai	0.8582	0.019
09:00:00	Shenzhen	0.630884	0.626579	0.617858	0.610942	0.613606		Shenzhen	0.62	0.0038
09:00:00	Wuhan	0.564375	0.551653	0.562671	0.539942	0.537164		Wuhan	0.5512	0.0056
10:00:00	Fuzhou	0.622051	0.602507	0.620501	0.586915	0.577079		Fuzhou	0.6018	0.0089
10:00:00	Shanghai	0.780918	0.781806	0.816967	0.851084	0.846126		Shanghai	0.8154	0.0151
10:00:00	Shenzhen	0.696334	0.693694	0.736938	0.77636	0.7788		Shenzhen	0.7364	0.0185
10:00:00	Wuhan	0.675949	0.672988	0.670529	0.68194	0.678524		Wuhan	0.676	0.002
11:00:00	Fuzhou	0.72776	0.679471	0.679761	0.650059	0.649205		Fuzhou	0.6773	0.0143
11:00:00	Shanghai	0.806761	0.815955	0.819286	0.811689	0.81053		Shanghai	0.8128	0.0022
11:00:00	Shenzhen	0.663982	0.715233	0.712279	0.695957	0.645677		Shenzhen	0.6866	0.0137
11:00:00	Wuhan	0.712917	0.710314	0.705938	0.698823	0.700697		Wuhan	0.7057	0.0027
12:00:00	Fuzhou	0.790018	0.787383	0.770029	0.768084	0.756686		Fuzhou	0.7744	0.0063
12:00:00	Shanghai	0.567323	0.56864	0.569407	0.579424	0.572783		Shanghai	0.5715	0.0022
12:00:00	Shenzhen	0.785485	0.787802	0.789327	0.788662	0.784907		Shenzhen	0.7872	0.0009
12:00:00	Wuhan	0.692083	0.673542	0.690074	0.66316	0.656965		Wuhan	0.6752	0.007
13:00:00	Fuzhou	0.727192	0.726196	0.739708	0.755643	0.759184		Fuzhou	0.7416	0.0069
13:00:00	Shanghai	0.700399	0.704397	0.74015	0.77653	0.784268		Shanghai	0.7411	0.0175
13:00:00	Shenzhen	0.825547	0.822006	0.82068	0.819014	0.826315		Shenzhen	0.8227	0.0014
13:00:00	Wuhan	0.767621	0.764119	0.80901	0.866047	0.852302		Wuhan	0.8118	0.021
14:00:00	Fuzhou	0.843961	0.847644	0.852902	0.868783	0.862086		Fuzhou	0.8551	0.0046
14:00:00	Shanghai	0.77347	0.726399	0.763875	0.685424	0.675692		Shanghai	0.725	0.0198
14:00:00	Shenzhen	0.919077	0.921244	0.918906	0.91765	0.926601		Shenzhen	0.9207	0.0016
14:00:00	Wuhan	0.906427	0.895943	0.896199	0.897242	0.895281		Wuhan	0.8982	0.0021
15:00:00	Fuzhou	0.756269	0.76189	0.752002	0.773404	0.76356		Fuzhou	0.7614	0.0036
15:00:00	Shanghai	0.87117	0.876248	0.876229	0.860283	0.843704		Shanghai	0.8655	0.0062
15:00:00	Shenzhen	0.90102	0.91454	0.902573	0.898041	0.912424		Shenzhen	0.9057	0.0033
15:00:00	Wuhan	0.807198	0.816337	0.815972	0.816258	0.81184		Wuhan	0.8135	0.0018
16:00:00	Fuzhou	0.488616	0.494487	0.497366	0.506664	0.50072		Fuzhou	0.4976	0.003
16:00:00	Shanghai	0.717868	0.691453	0.730948	0.702996	0.673429		Shanghai	0.7033	0.01
16:00:00	Shenzhen	0.806664	0.787888	0.849003	0.809717	0.726773		Shenzhen	0.796	0.02
16:00:00	Wuhan	0.797031	0.814912	0.814377	0.834843	0.815447		Wuhan	0.8153	0.006
17:00:00	Fuzhou	0.108419	0.123989	0.111049	0.131295	0.142591		Fuzhou	0.1235	0.0064
17:00:00	Shanghai	0.456105	0.430464	0.445199	0.436418	0.448504		Shanghai	0.4433	0.0045
17:00:00	Shenzhen	0.257877	0.242066	0.224785	0.212537	0.201127		Shenzhen	0.2277	0.0102
17:00:00	Wuhan	0.310022	0.318006	0.312595	0.31241	0.301662		Wuhan	0.3109	0.0027
Daily average values of Ls
Provenances/Time	09:00:00	10:00:00	11:00:00	12:00:00	13:00:00	14:00:00	15:00:00	16:00:00	17:00:00	Average	SE	5% level
Fuzhou	0.6697	0.6018	0.6773	0.7744	0.7416	0.8551	0.7614	0.4976	0.1235	0.6336	0.0726	a
Shanghai	0.8582	0.8154	0.8128	0.5715	0.7411	0.725	0.8655	0.7033	0.4433	0.7262	0.0467	a
Shenzhen	0.62	0.7364	0.6866	0.7872	0.8227	0.9207	0.9057	0.796	0.2277	0.7226	0.0697	a
Wuhan	0.5512	0.676	0.7057	0.6752	0.8118	0.8982	0.8135	0.8153	0.3109	0.6953	0.0592	a

## Sheet: WUE
Diurnal variations of WUE
Time	Provenances							Provenances	Mean	SE
09:00:00	Fuzhou	12.9631	12.9273	12.8005	12.6196	12.6565		Fuzhou	12.7934	0.0692
09:00:00	Shanghai	16.7304	16.6807	16.1096	15.8704	15.7522		Shanghai	16.2286	0.2032
09:00:00	Shenzhen	11.8637	12.1895	12.1474	11.4557	11.498		Shenzhen	11.8308	0.1552
09:00:00	Wuhan	10.5682	10.3443	10.3352	10.7728	10.6955		Wuhan	10.5432	0.0893
10:00:00	Fuzhou	10.2284	9.8619	10.1975	9.677	9.63702		Fuzhou	9.9204	0.1254
10:00:00	Shanghai	12.8025	12.2342	12.2604	13.3722	13.3026		Shanghai	12.7944	0.244
10:00:00	Shenzhen	11.4439	12.3303	11.4408	13.2121	13.241		Shenzhen	12.3336	0.399
10:00:00	Wuhan	10.4069	10.4488	10.3749	10.5609	10.5369		Wuhan	10.4657	0.0361
11:00:00	Fuzhou	9.07715	9.05881	9.08492	9.07753	9.09546		Fuzhou	9.0788	0.006
11:00:00	Shanghai	10.1054	10.2088	10.2552	10.1863	10.1732		Shanghai	10.1858	0.0245
11:00:00	Shenzhen	8.99277	8.95984	9.01818	9.10295	9.08212		Shenzhen	9.0312	0.0269
11:00:00	Wuhan	9.77825	9.74215	9.72914	9.68392	9.71253		Wuhan	9.7292	0.0157
12:00:00	Fuzhou	10.2349	10.2182	10.3282	10.3754	10.3687		Fuzhou	10.3051	0.0332
12:00:00	Shanghai	6.79361	6.87114	6.81823	7.06903	6.98453		Shanghai	6.9073	0.0521
12:00:00	Shenzhen	10.0957	10.0686	9.98567	9.97143	10.0322		Shenzhen	10.0307	0.0237
12:00:00	Wuhan	9.25715	9.15218	9.23147	9.12785	9.01413		Wuhan	9.1566	0.0429
13:00:00	Fuzhou	10.1839	10.4844	10.4959	9.88927	9.91425		Fuzhou	10.1936	0.1317
13:00:00	Shanghai	9.40331	9.01559	8.99316	9.9357	9.8338		Shanghai	9.4363	0.1977
13:00:00	Shenzhen	10.8724	10.7456	10.7931	10.7985	10.7773		Shenzhen	10.7974	0.0209
13:00:00	Wuhan	10.2979	10.2522	10.7469	11.3003	11.1708		Wuhan	10.7536	0.2159
14:00:00	Fuzhou	11.3848	11.328	11.4612	11.4654	11.4616		Fuzhou	11.4202	0.0276
14:00:00	Shanghai	10.2202	9.60511	10.0899	9.07256	8.94119		Shanghai	9.5858	0.2585
14:00:00	Shenzhen	12	12.0018	12.0487	12.0883	11.953		Shenzhen	12.0184	0.0231
14:00:00	Wuhan	11.8462	11.7079	11.9593	12.2151	12.1882		Wuhan	11.9833	0.0977
15:00:00	Fuzhou	11.6369	11.7228	11.5755	11.9059	11.7399		Fuzhou	11.7162	0.056
15:00:00	Shanghai	13.2766	13.2904	13.29	13.1701	12.9156		Shanghai	13.1885	0.0719
15:00:00	Shenzhen	16.7147	16.9646	16.7403	16.656	16.9315		Shenzhen	16.8014	0.0616
15:00:00	Wuhan	14.3326	14.4038	14.3917	14.3261	14.2832		Wuhan	14.3475	0.0223
16:00:00	Fuzhou	9.97292	9.68875	9.74232	9.76291	10.2371		Fuzhou	9.8808	0.1013
16:00:00	Shanghai	14.5486	14.1456	14.8174	14.5569	13.9316		Shanghai	14.4	0.1589
16:00:00	Shenzhen	16.6393	17.5401	16.1406	16.6148	14.7153		Shenzhen	16.33	0.4628
16:00:00	Wuhan	16.0685	16.4388	16.4388	16.855	16.4516		Wuhan	16.4505	0.1245
17:00:00	Fuzhou	2.153	2.51613	2.21304	2.69542	2.95985		Fuzhou	2.5075	0.1504
17:00:00	Shanghai	10.3888	9.78124	10.1419	9.93295	10.2253		Shanghai	10.094	0.1073
17:00:00	Shenzhen	5.91783	5.52031	5.0883	4.78077	4.49605		Shenzhen	5.1607	0.2544
17:00:00	Wuhan	7.04738	7.26347	7.3216	6.84086	7.09412		Wuhan	7.1135	0.0851
Daily average values of WUE
Provenances/Time	09:00:00	10:00:00	11:00:00	12:00:00	13:00:00	14:00:00	15:00:00	16:00:00	17:00:00	Average	SE	5% level
Fuzhou	12.7934	9.9204	9.0788	10.3051	10.1936	11.4202	11.7162	9.8808	2.5075	9.7573	0.9816	a
Shanghai	16.2286	12.7944	10.1858	6.9073	9.4363	9.5858	13.1885	14.4	10.094	11.4245	0.9716	a
Shenzhen	11.8308	12.3336	9.0312	10.0307	10.7974	12.0184	16.8014	16.33	5.1607	11.5927	1.1865	a
Wuhan	10.5432	10.4657	9.7292	9.1566	10.7536	11.9833	14.3475	16.4505	7.1135	11.1715	0.9301	a
Adaily	（μmol·m⁻²·d⁻¹）
Fuzhou	198967	204323	200793	194627	192929
Shanghai	125953	124685	125997	128455	128119
Shenzhen	199759	198105	200368	194499	193774
Wuhan	204154	204126	204986	207012	206942
Adaily	（mol·m⁻²·d⁻¹）						Average	SE	5% level
Fuzhou	0.198967	0.204323	0.200793	0.194627	0.192929		0.1983	0.0021	b
Shanghai	0.125953	0.124685	0.125997	0.128455	0.128119		0.1266	0.0007	c
Shenzhen	0.199759	0.198105	0.200368	0.194499	0.193774		0.1973	0.0013	b
Wuhan	0.204154	0.204126	0.204986	0.207012	0.206942		0.2054	0.0006	a

## Sheet: SPAD
SPAD					Mean	SE	5% level
FZ	25.45	25.6	24		25.0167	0.5102	a
SH	18.05	19.7	18.2		18.65	0.5268	b
SZ	24.1	22.8	29.1		25.3333	1.9204	a
WH	23.3	22.3	31.4		25.6667	2.8812	a
