# Supplementary material for: Elucidation of the adaptability of Cinnamomum camphora seedlings from different provenances via analyzing photosynthetic characteristics and anatomical structure
Source: PeerJ. 2025 Sep 5;13:e19934. doi: 10.7717/peerj.19934 (PMC12422265; doi:10.7717/peerj.19934)
Supplement: Supplemental Information 2 — The stomata-related data of different provenances camphor seedlings. The data includes raw data, mean, standard error, and significance analysis. [file peerj-13-19934-s002.xlsx]

## Sheet: Daily average value of stomatal
Daily average value of stomatal characteristics
SL																	Mean	SE
FZ	13.896	15.8651	14.63	13.0284	13.7671	14.0592	13.8802	14.7585	13.0708	13.1685	13.8661	13.5742	14.3547	14.9057	14.5335		14.0913	0.1995	ab
SH	14.912	13.4579	13.0074	13.9665	15.1929	15.3491	14.0607	13.9435	13.681	14.4877	14.7294	13.8801	13.8562	15.8866	13.9487		14.2913	0.2019	ab
SZ	11.9255	15.0658	12.3143	13.6562	12.0771	13.7602	13.7002	13.9574	13.2399	13.3877	13.6153	14.5088	14.5524	14.6082	13.6254		13.6013	0.2392	b
WH	14.5376	13.6398	16.9844	15.7517	14.2557	13.2692	15.0836	13.4277	13.1547	14.1297	14.4308	16.3045	16.2964	13.5653	14.6987		14.6353	0.3131	a
SW
FZ	14.2364	11.9604	12.68	11.8821	12.5613	13.2287	12.8911	10.9138	11.0082	13.1675	12.1763	12.4679	14.3207	15.0351	13.4255		12.798	0.301	a
SH	10.8055	10.7521	10.339	12.9974	13.7605	12.3606	11.4909	10.9941	12.6851	12.7336	12.9294	12.8071	13.2773	12.6733	12.6398		12.2167	0.2722	a
SZ	10.6399	11.3695	10.035	10.2298	11.3102	13.3475	12.7298	11.4613	12.3138	12.4117	11.671	12.5934	12.3582	12.6505	12.7869		11.8607	0.2577	a
WH	11.3429	11.9052	11.0733	14.0308	13.7964	11.012	11.7392	11.6961	12.8098	12.9968	11.8566	16.5375	15.5029	12.311	13.1493		12.7847	0.4171	a
SS
FZ	185.869	169.903	175.86	133.847	157.565	154.185	133.722	122.413	107.252	136.541	132.394	130.492	174.638	168.095	145.76		148.569	5.91	a
SH	130.07	113.134	105.666	138.836	187.071	165.219	123.24	120.95	135.087	144.754	144.462	141.548	147.453	168.191	151.86		141.169	5.5785	ab
SZ	90.2118	130.993	105.111	127.572	104.757	145.161	124.271	118.209	122.074	128.567	118.219	170.234	148.402	132.761	146.853		127.559	5.1691	b
WH	131.915	116.568	128.128	155.685	136.626	120.049	123.213	116.326	126.931	241.937	133.664	204.434	194.852	135.719	136.316		146.825	9.5987	ab
DS
FZ	757.143	728.571	971.429	828.571	542.857	657.143	528.571	728.571	900	700	571.429						719.481	42.9986	ab
SH	728.571	671.429	600	742.857	628.571	457.143	500	785.714	657.143	771.429							654.286	35.1092	b
SZ	1085.71	685.714	885.714	900	828.571	728.571	842.857	742.857	957.143	642.857	600						809.091	43.853	a
WH	800	657.143	714.286	814.286	771.429	742.857	942.857	771.429	742.857	885.714							784.286	26.1211	a
