# Supplementary material for: Elucidation of the adaptability of Cinnamomum camphora seedlings from different provenances via analyzing photosynthetic characteristics and anatomical structure
Source: PeerJ. 2025 Sep 5;13:e19934. doi: 10.7717/peerj.19934 (PMC12422265; doi:10.7717/peerj.19934)
Supplement: Supplemental Information 3 — Two labels showing raw data, mean value, standard error and significance analysis of stem or leaf anatomical structure of Cinnamomum camphor seedlings of different provenances. [file peerj-13-19934-s003.xlsx]

## Sheet: Stem
Stem anatomical structural parameters
EpT													Mean	SE	5% level
	FZ	9.589	8.497	9.217	7.169	6.912	10.149	8.295	7.834	8.409	5.152		8.1223	0.4593	a
	SH	7.333	6.667	5.963	6.289	6.5	7.159	7.382	6.021	8.944	6.799		6.9057	0.2771	a
	SZ	10.541	6.96	8.769	6.667	8.433	8.055	7.18	8.028	7.803	7.803		8.0239	0.3471	a
	WH	7.81	9.434	7.106	7.382	8.139	9.618	5	10.966	8.944	7.159		8.1558	0.5277	a
CoT
	FZ	72.003	70.14	94.233	90.705	74.788	71.262	71.021	58.523	57.009	62.71		72.2394	3.8716	a
	SH	54.589	48.488	48.534	43.64	48.667	49.72	42.01	57.969	62.861	58.013		51.4491	2.1181	c
	SZ	55.262	60.276	65.209	58.826	54.944	64.622	55.503	53.045	63.668	57.881		58.9236	1.3861	b
	WH	61.225	68.031	62.154	69.822	57.985	55.733	62.143	66.308	50.288	51.034		60.4723	2.1246	b
PhT
	FZ	69.413	63.115	62.64	67.798	68.253	64.285	64.949	65.042	60.879	76.979		66.3353	1.4536	a
	SH	36.497	31.064	37.483	35.777	40.46	32.65	34.655	42.164	52.747	39.237		38.2734	1.9352	c
	SZ	42.573	30.529	43.417	46.838	50.089	43.533	38.256	55.913	62.586	43.235		45.6969	2.831	b
	WH	61.523	58.241	53.099	50.658	49.905	40.478	44.911	45.069	49.601	39.966		49.3451	2.2315	b
XyT
	FZ	89.287	107.522	73.853	98.181	58.993	56.608	82.783	84.292	89.401	102.673		84.3593	5.4151	b
	SH	115.038	116.276	120.024	112.556	105.209	99.771	101.071	137.609	114.551	125.936		114.804	3.6289	a
	SZ	76.903	74.808	90.785	69.112	85	84.126	65.299	83.738	83.972			79.3048	2.7763	b
	WH	92.445	83.934	92.284	109.249	105.718	67.765	68.315	65.391	104.862	97.908		88.7871	5.2752	b
PiD
	FZ	558.484	795.605	620.345	633.942	529.83	743.68	625.318	506.79	674.232	484.09		617.232	32.0458	b
	SH	568.025	493.818	528.708	557.73	520.787	495.013	519.085	561.854	575.123	566		538.614	9.7516	c
	SZ	559.217	634.69	609.688	639.225	523.454	635.601	501.597	628.548	605.749	583.136		592.091	15.5691	bc
	WH	749.197	777.977	588.139	850.941	830.453	707.63	610.082	816.149	808.935			748.834	31.8096	a

## Sheet: Leaf
Leaf anatomical structural parameters
UET																Mean	SE	5% level
	FZ	17.343	14.76	17.466	17.466	13.284	14.022	14.268	14.268	14.514	11.811					14.9202	0.6058	b
	SH	14.733	14.917	14.549	10.866	12.339	10.866	11.971	12.523	12.707	15.101					13.0572	0.5204	c
	SZ	15.838	15.838	18.416	15.838	14.365	14.856	16.083	15.224	15.225	14.978					15.6661	0.3502	b
	WH	19.89	18.294	18.048	17.557	17.925	19.276	17.312	15.347	12.4						17.3388	0.7493	a
PT
	FZ	23.37	23.418	23.91	22.634	24.91	25.418	21.404	20.174	23.616	23.375					23.2229	0.4868	b
	SH	19.31	18.757	13.758	20.994	16.81	18.204	19.414	20.678	18.731	16.125					18.2781	0.6924	c
	SZ	28.913	21.547	24.954	24.678	20.442	24.033	22.652	24.309	22.099	28.729					24.2356	0.8914	ab
	WH	21.24	29.834	22.836	26.028	25.292	27.87	25.783	28.729	24.494	23.573	31.86				26.1399	0.9589	a
ST
	FZ	50.923	47.484	39.852	43.297	41.328	42.804	42.066	38.622	38.622	41.82	40.836				42.514	1.1217	a
	SH	36.15	37.676	42.781	41.805	31.256	37.808	33.02	32.361	32.939	35.973					36.1769	1.2448	b
	SZ	36.218	36.097	32.658	28.238	31.676	39.165	36.464	33.026	34.623	41.129					34.9294	1.1832	b
	WH	41.252	49.846	35.114	35.912	38.121	35.544	37.569	34.07	37.079	39.533	36.341				38.2165	1.3167	b
LET
	FZ	11.316	12.423	11.316	10.702	11.07	11.193	11.44	12.547	11.07	11.808	8.487	7.749	9.102		10.7864	0.4043	b
	SH	11.541	12.277	11.111	12.093	11.786	13.505	15.838	14.18	16.298						13.181	0.6325	a
	SZ	7.919	10.497	12.523	8.932	12.247	14.733	10.405	12.155	10.681						11.1213	0.682	b
	WH	11.05	11.295	13.812	9.853	11.786	11.142	13.812	9.392	11.326	10.958					11.4426	0.4545	b
MT
	FZ	61.255	55.843	58.795	59.287	62.731	65.191	67.651	74.293	76.753	76.753					65.8552	2.4416	a
	SH	57.95	55.495	55.249	61.878	56.722	55.249	53.53	50.583	51.566	51.075					54.9297	1.0963	b
	SZ	56.967	58.686	57.213	57.213	56.967	59.914	65.07	57.213	53.039						58.0313	1.0718	b
	WH	61.142	63.843	65.071	63.843	60.651	60.897	62.861	60.16	65.808	65.256	59.914				62.6769	0.6643	a
LT
	FZ	99.877	94.465	86.101	83.395	84.871	82.411	82.165	78.967	83.641	83.887					85.978	1.9983	a
	SH	76.611	76.12	74.401	72.437	73.174	75.384	74.401	79.313	77.103	75.138					75.4082	0.6324	c
	SZ	79.803	77.839	76.857	76.611	77.594	78.821	74.647	82.504	85.206	83.978					79.386	1.0921	b
	WH	87.416	87.171	89.135	91.345	91.099	87.908	83.978	88.398	88.152	86.679					88.1281	0.6754	a
P/S
	FZ	0.458928	0.493177	0.59997	0.522761	0.602739	0.593823	0.508819	0.522345	0.611465	0.558943					0.5473	0.0169	b
	SH	0.534163	0.49785	0.321591	0.502189	0.417578	0.481485	0.587947	0.638979	0.568657						0.5056	0.0315	b
	SZ	0.798305	0.596919	0.764101	0.873929	0.645347	0.613635	0.621215	0.736056	0.638275						0.6986	0.0326	a
	WH	0.514884	0.598523	0.650339	0.724772	0.663466	0.784099	0.686284	0.843235	0.66059	0.596287					0.6722	0.0301	a
CTR
	FZ	0.233988	0.247901	0.277697	0.271407	0.293504	0.30843	0.2605	0.255474	0.28235	0.278649					0.271	0.007	bc
	SH	0.252053	0.246414	0.184917	0.289824	0.229726	0.241484	0.260937	0.260714	0.242935						0.2454	0.0094	c
	SZ	0.362305	0.276815	0.324681	0.322121	0.263448	0.304906	0.303455	0.29464	0.25936						0.3013	0.0109	a
	WH	0.242976	0.342247	0.256196	0.284942	0.277632	0.317036	0.307021	0.324996	0.277861	0.271957					0.2903	0.01	ab
SR
	FZ	0.509857	0.502662	0.462852	0.51918	0.486951	0.519397	0.51197	0.48909	0.461759	0.498528					0.4962	0.0067	a
	SH	0.471864	0.494955	0.575006	0.577122	0.550141	0.501539	0.443811	0.408016	0.427208						0.4944	0.0209	a
	SZ	0.453843	0.463739	0.424919	0.368589	0.408227	0.496885	0.488486	0.400296	0.406345						0.4346	0.0145	b
	WH	0.471904	0.571819	0.393942	0.393147	0.418457	0.404332	0.447367	0.385416	0.420626	0.456085					0.4363	0.0176	b
