# Supplementary material for: Elucidation of the adaptability of Cinnamomum camphora seedlings from different provenances via analyzing photosynthetic characteristics and anatomical structure
Source: PeerJ. 2025 Sep 5;13:e19934. doi: 10.7717/peerj.19934 (PMC12422265; doi:10.7717/peerj.19934)
Supplement: Supplemental Information 4 — Raw data for all correlation analysis in the text. The labels below the table can distinguish the original data displayed in each table. In addition, each table header has the name of the data displayed in the table. For example, the table label Table 3 represents the original data of Table 3. [file peerj-13-19934-s004.xlsx]

## Sheet: Tab. 3
Correlation coefficient of observed environment and camphor index
Pn	Adaily	Gs	Ci	Tr	Ls	WUE	SPAD	Ta	RH	VPD
6.5669	0.1983	0.0393	164.526	0.6801	0.6336	9.7573	25.0167	18.4154	32.4578	1.71107
4.1344	0.1266	0.0218667	123.197	0.4167	0.7262	11.4245	18.65	20.3857	29.418	1.79271
6.5221	0.1973	0.0333667	133.319	0.5992	0.7226	11.5927	25.3333	22.811	28.0295	1.70808
6.8431	0.2054	0.0366556	146.413	0.645	0.6953	11.1715	25.6667	23.1374	28.5019	1.70369
								23.2302	29.5435
								23.4104	29.0836
								20.3733	32.1213
								18.0765	34.1053
								16.7664	34.9789
	Pn	Adaily	Gs	Ci	Tr	Ls	WUE	SPAD	Ta	RH	VPD
Ta	0.29	0.29	-0.02	-0.44	0.01	0.67	0.79	0.31	1	-0.93*	-0.3
RH	0.03	0.03	0.34	0.72	0.31	-0.88*	-0.95*	0	-0.93*	1	-0.01
VPD	-1.00**	-1.00**	-0.94*	-0.67	-0.95*	0.46	0.3	-1.00**	-0.3	-0.01	1
	* p<0.05	** p<0.01

## Sheet: Tab. 5
Correlation coefficient of camphor stomatal characteristics and environmental factors
SL	SW	SS	DS	Longitude	Latitude	MAT	MAP	Altitude
14.0913	12.798	148.569	719.481	26.08	119.25	12.4	634	6.8
14.2913	12.2167	141.169	654.286	31.1	121.26	15.5	1143.1	7
13.6013	11.8607	127.559	809.091	22.91	114.08	21.9	1800	85
14.6353	12.7847	146.825	784.286	30.47	114.33	16.8	1170	25.3
	Longitude	Latitude	MAT	MAP	Altitude
SL	0.91*	0.17	-0.53	-0.51	-0.72
SW	0.45	0.13	-0.78	-0.84	-0.72
SS	0.62	0.4	-0.90*	-0.92*	-0.90*
DS	-0.58	-0.98**	0.67	0.57	0.78
	* p<0.05	** p<0.01

## Sheet: Tab. 8
Correlation coefficient of environmental conditions in provenances and leaf anatomical characters
Longitude	Latitude	MAT	MAP	Soil PH	Altitude	UET	PT	ST	LET	MT	LT	P/S	CTR	SR
26.08	119.25	12.4	634	6.5	6.8	14.9202	23.2229	42.514	10.7864	65.8552	85.978	0.5473	0.271	0.4962
31.1	121.26	15.5	1143.1	7.6	7	13.0572	18.2781	36.1769	13.181	54.9297	75.4082	0.5056	0.2454	0.4944
22.91	114.08	21.9	1800	6.8	85	15.6661	24.2356	34.9294	11.1213	58.0313	79.386	0.6986	0.3013	0.4346
30.47	114.33	16.8	1170	7.1	25.3	17.3388	26.1399	38.2165	11.4426	62.6769	88.1281	0.6722	0.2903	0.4363
	UET	PT	ST	LET	MT	LT	P/S	CTR	SR
Longitude	-0.15	-0.35	0.05	0.69	-0.17	0.01	-0.47	-0.62	0.29
Latitude	-0.88*	-0.87	0.3	0.58	-0.19	-0.44	-1.00**	-0.96**	0.97**
MAT	0.3	0.29	-0.84	-0.07	-0.5	-0.32	0.77	0.66	-0.8
MAP	0.2	0.16	-0.90*	0.06	-0.61	-0.43	0.69	0.55	-0.74
Soil PH	-0.41	-0.61	-0.58	0.96*	-0.78	-0.58	-0.32	-0.57	0.11
Altitude	0.36	0.42	-0.63	-0.36	-0.26	-0.18	0.81	0.79	-0.77
	* p<0.05	** p<0.01

## Sheet: Tab. 9
the correlation between photosynthetic characteristics and anatomical structure
	Pn	Adaily	Gs	Ci	Tr	Ls	WUE	SPAD	SL	SW	SS	DS	EPT	COT	PhT	XyT	PiT	UET	PT	ST	LET	MT	LT	P/S	CTR	SR
FZ	6.5669	0.1983	0.0393	164.526	0.6801	0.6336	9.7573	25.0167	14.0913	12.798	148.569	719.481	8.1223	72.2394	66.3353	84.3593	617.232	14.9202	23.2229	42.514	10.7864	65.8552	85.978	0.5473	0.271	0.4962
SH	4.1344	0.1266	0.0218667	123.197	0.4167	0.7262	11.4245	18.65	14.2913	12.2167	141.169	654.286	6.9057	51.4491	38.2734	114.804	538.614	13.0572	18.2781	36.1769	13.181	54.9297	75.4082	0.5056	0.2454	0.4944
SZ	6.5221	0.1973	0.0333667	133.319	0.5992	0.7226	11.5927	25.3333	13.6013	11.8607	127.559	809.091	8.0239	58.9236	45.6969	79.3048	592.091	15.6661	24.2356	34.9294	11.1213	58.0313	79.386	0.6986	0.3013	0.4346
WH	6.8431	0.2054	0.0366556	146.413	0.645	0.6953	11.1715	25.6667	14.6353	12.7847	146.825	784.286	8.1558	60.4723	49.3451	88.7871	748.834	17.3388	26.1399	38.2165	11.4426	62.6769	88.1281	0.6722	0.2903	0.4363
Correlation analysis
	Pn	Adaily	Gs	Ci	Tr	Ls	WUE	SPAD	SL	SW	SS	DS	EPT	COT	PhT	XyT	PiT	UET	PT	ST	LET	MT	LT	P/S	CTR	SR
Pn	1	1.00**	0.95*	0.7	0.96**	-0.48	-0.33	1.00**	-0.11	0.35	0.05	0.84	1.00**	0.7	0.63	-0.94*	0.72	0.87	0.96**	0.36	-0.94*	0.76	0.82	0.73	0.86	-0.59
Adaily	1.00**	1	0.95*	0.7	0.96**	-0.48	-0.33	1.00**	-0.12	0.34	0.04	0.84	1.00**	0.7	0.63	-0.94*	0.71	0.87	0.96**	0.36	-0.94*	0.76	0.82	0.73	0.86	-0.59
Gs	0.95*	0.95*	1	0.89*	1.00**	-0.73	-0.61	0.94*	-0.04	0.55	0.28	0.63	0.97**	0.88*	0.84	-0.87	0.66	0.74	0.85	0.63	-0.95*	0.92*	0.89*	0.47	0.66	-0.31
Ci	0.7	0.7	0.89*	1	0.87	-0.96**	-0.90*	0.66	0.13	0.77	0.61	0.2	0.74	0.97**	0.98**	-0.6	0.48	0.41	0.54	0.92*	-0.78	0.99**	0.84	0.01	0.23	0.16
Tr	0.96**	0.96**	1.00**	0.87	1	-0.71	-0.58	0.95*	-0.05	0.52	0.25	0.66	0.98**	0.87	0.82	-0.89*	0.66	0.75	0.87	0.6	-0.96**	0.91*	0.88*	0.5	0.68	-0.34
Ls	-0.48	-0.48	-0.73	-0.96**	-0.71	1	0.98**	-0.45	-0.13	-0.76	-0.68	0.06	-0.54	-0.95*	-0.97**	0.41	-0.27	-0.16	-0.29	-0.98**	0.63	-0.92*	-0.69	0.25	0.02	-0.42
WUE	-0.33	-0.33	-0.61	-0.90*	-0.58	0.98**	1	-0.29	-0.1	-0.72	-0.68	0.22	-0.39	-0.90*	-0.94*	0.28	-0.11	0.02	-0.12	-0.98**	0.51	-0.83	-0.56	0.41	0.17	-0.57
SPAD	1.00**	1.00**	0.94*	0.66	0.95*	-0.45	-0.29	1	-0.17	0.29	-0.01	0.87	0.99**	0.68	0.61	-0.96*	0.68	0.86	0.96*	0.32	-0.95*	0.73	0.78	0.75	0.88*	-0.61
SL	-0.11	-0.12	-0.04	0.13	-0.05	-0.13	-0.1	-0.17	1	0.73	0.79	-0.3	-0.12	-0.1	-0.04	0.44	0.57	0.22	0.04	0.29	0.33	0.21	0.43	-0.24	-0.35	0.11
SW	0.35	0.34	0.55	0.77	0.52	-0.76	-0.72	0.29	0.73	1	0.95*	-0.13	0.37	0.61	0.66	-0.07	0.64	0.35	0.32	0.85	-0.29	0.8	0.81	-0.23	-0.14	0.26
SS	0.05	0.04	0.28	0.61	0.25	-0.68	-0.68	-0.01	0.79	0.95*	1	-0.42	0.08	0.44	0.52	0.22	0.43	0.07	0.03	0.8	-0.01	0.62	0.6	-0.49	-0.43	0.49
DS	0.84	0.84	0.63	0.2	0.66	0.06	0.22	0.87	-0.3	-0.13	-0.42	1	0.81	0.24	0.14	-0.85	0.58	0.85	0.89*	-0.2	-0.72	0.29	0.47	0.98**	1.00**	-0.91*
EPT	1.00**	1.00**	0.97**	0.74	0.98**	-0.54	-0.39	0.99**	-0.12	0.37	0.08	0.81	1	0.74	0.68	-0.94*	0.69	0.84	0.94*	0.41	-0.96*	0.79	0.83	0.68	0.83	-0.53
COT	0.7	0.7	0.88*	0.97**	0.87	-0.95*	-0.90*	0.68	-0.1	0.61	0.44	0.24	0.74	1	0.99**	-0.68	0.32	0.33	0.5	0.87	-0.84	0.94*	0.73	0.03	0.28	0.17
PhT	0.63	0.63	0.84	0.98**	0.82	-0.97**	-0.94*	0.61	-0.04	0.66	0.52	0.14	0.68	0.99**	1	-0.6	0.3	0.27	0.43	0.91*	-0.78	0.94*	0.71	-0.07	0.18	0.26
XyT	-0.94*	-0.94*	-0.87	-0.6	-0.89*	0.41	0.28	-0.96*	0.44	-0.07	0.22	-0.85	-0.94*	-0.68	-0.6	1	-0.45	-0.71	-0.85	-0.24	0.97**	-0.63	-0.6	-0.72	-0.88*	0.56
PiT	0.72	0.71	0.66	0.48	0.66	-0.27	-0.11	0.68	0.57	0.64	0.43	0.58	0.69	0.32	0.3	-0.45	1	0.92*	0.84	0.28	-0.47	0.61	0.88*	0.57	0.55	-0.58
UET	0.87	0.87	0.74	0.41	0.75	-0.16	0.02	0.86	0.22	0.35	0.07	0.85	0.84	0.33	0.27	-0.71	0.92*	1	0.97**	0.1	-0.66	0.54	0.79	0.83	0.84	-0.8
PT	0.96**	0.96**	0.85	0.54	0.87	-0.29	-0.12	0.96*	0.04	0.32	0.03	0.89*	0.94*	0.5	0.43	-0.85	0.84	0.97**	1	0.19	-0.81	0.64	0.81	0.83	0.89*	-0.75
ST	0.36	0.36	0.63	0.92*	0.6	-0.98**	-0.98**	0.32	0.29	0.85	0.8	-0.2	0.41	0.87	0.91*	-0.24	0.28	0.1	0.19	1	-0.48	0.88	0.67	-0.38	-0.17	0.51
LET	-0.94*	-0.94*	-0.95*	-0.78	-0.96**	0.63	0.51	-0.95*	0.33	-0.29	-0.01	-0.72	-0.96*	-0.84	-0.78	0.97**	-0.47	-0.66	-0.81	-0.48	1	-0.79	-0.71	-0.55	-0.75	0.36
MT	0.76	0.76	0.92*	0.99**	0.91*	-0.92*	-0.83	0.73	0.21	0.8	0.62	0.29	0.79	0.94*	0.94*	-0.63	0.61	0.54	0.64	0.88	-0.79	1	0.91*	0.12	0.32	0.03
LT	0.82	0.82	0.89*	0.84	0.88*	-0.69	-0.56	0.78	0.43	0.81	0.6	0.47	0.83	0.73	0.71	-0.6	0.88*	0.79	0.81	0.67	-0.71	0.91*	1	0.36	0.47	-0.27
P/S	0.73	0.73	0.47	0.01	0.5	0.25	0.41	0.75	-0.24	-0.23	-0.49	0.98**	0.68	0.03	-0.07	-0.72	0.57	0.83	0.83	-0.38	-0.55	0.12	0.36	1	0.96**	-0.97**
CTR	0.86	0.86	0.66	0.23	0.68	0.02	0.17	0.88*	-0.35	-0.14	-0.43	1.00**	0.83	0.28	0.18	-0.88*	0.55	0.84	0.89*	-0.17	-0.75	0.32	0.47	0.96**	1	-0.88*
SR	-0.59	-0.59	-0.31	0.16	-0.34	-0.42	-0.57	-0.61	0.11	0.26	0.49	-0.91*	-0.53	0.17	0.26	0.56	-0.58	-0.8	-0.75	0.51	0.36	0.03	-0.27	-0.97**	-0.88*	1
	Pn	Adaily	Gs	Ci	Tr	Ls	WUE	SPAD	SL	SW	SS	DS	EPT	COT	PhT	XyT	PiT	UET	PT	ST	LET	MT	LT	P/S	CTR	SR
FZ	6.5669	0.1983	0.0393	164.526	0.6801	0.6336	9.7573	25.0167	14.0913	12.798	148.569	719.481	8.1223	72.2394	66.3353	84.3593	617.232	14.9202	23.2229	42.514	10.7864	65.8552	85.978	0.5473	0.271	0.4962
SH	4.1344	0.1266	0.0218667	123.197	0.4167	0.7262	11.4245	18.65	14.2913	12.2167	141.169	654.286	6.9057	51.4491	38.2734	114.804	538.614	13.0572	18.2781	36.1769	13.181	54.9297	75.4082	0.5056	0.2454	0.4944
SZ	6.5221	0.1973	0.0333667	133.319	0.5992	0.7226	11.5927	25.3333	13.6013	11.8607	127.559	809.091	8.0239	58.9236	45.6969	79.3048	592.091	15.6661	24.2356	34.9294	11.1213	58.0313	79.386	0.6986	0.3013	0.4346
WH	6.8431	0.2054	0.0366556	146.413	0.645	0.6953	11.1715	25.6667	14.6353	12.7847	146.825	784.286	8.1558	60.4723	49.3451	88.7871	748.834	17.3388	26.1399	38.2165	11.4426	62.6769	88.1281	0.6722	0.2903	0.4363
						(negatively correlated)			(negatively correlated)							(negatively correlated)					(negatively correlated)					(negatively correlated)
	Comprehensive evaluation																											Average membership function value
FZ	0.898032	0.909898	1	1	0	1	0	0.0926361	0.473888	1	1	0.421141	0.973202	1	0	0.142384	0.373977	0.435118	0.628965	0	0	1	0.830966	0.216062	0.542039	0		0.557532
SH	0	0	0	0	1	0	0.908358	1	0.667311	0.379814	0.647797	0	0	0	1	1	0	0	0	0.835522	1	0	0	0	1	0.0292208		0.377552
SZ	0.881493	0.897208	0.659656	0.244926	0.307137	0.0388769	1	0.0475152	0	0	0	1	0.894488	0.359519	0.73546	0	0.254383	0.609328	0.757778	1	0.139856	0.283886	0.312723	1	0	1		0.456969
WH	1	1	0.848311	0.561748	0.133257	0.333693	0.770513	0	1	0.98581	0.916994	0.839765	1	0.43401	0.605454	0.267113	1	1	1	0.566609	0.274033	0.709093	1	0.863212	0.19678	0.972403		0.692256
																													Rank
FZ	0.898032	0.909698	1	1	0	1	0	0.0926361	0.473888	1	1	0.421141	0.973202	1	0	0.142384	0.373977	0.435118	0.628965	0	0	1	0.830966	0.216062	0.542039	0		0.557524	2
SH	0	0	0	0	1	0	0.908358	1	0.667311	0.379814	0.647797	0	0	0	1	1	0	0	0	0.835522	1	0	0	0	1	0.0292208		0.377552	4
SZ	0.881493	0.896669	0.659656	0.244926	0.307137	0.0388769	1	0.0475152	0	0	0	1	0.894488	0.359519	0.73546	0	0.254383	0.609328	0.757778	1	0.139856	0.283886	0.312723	1	0	1		0.456948	3
WH	1	1	0.848311	0.561748	0.133257	0.333693	0.770513	0	1	0.98581	0.916994	0.839765	1	0.43401	0.605454	0.267113	1	1	1	0.566609	0.274033	0.709093	1	0.863212	0.19678	0.972403		0.692256	1
